# Supplementary material
Source: PubMed Central journal article supplement (PMC7661308)
Supplement: rspb20201550supp1.pdf [file rspb20201550supp1.pdf]

## 1 SUPPLEMENTARY FIGURES

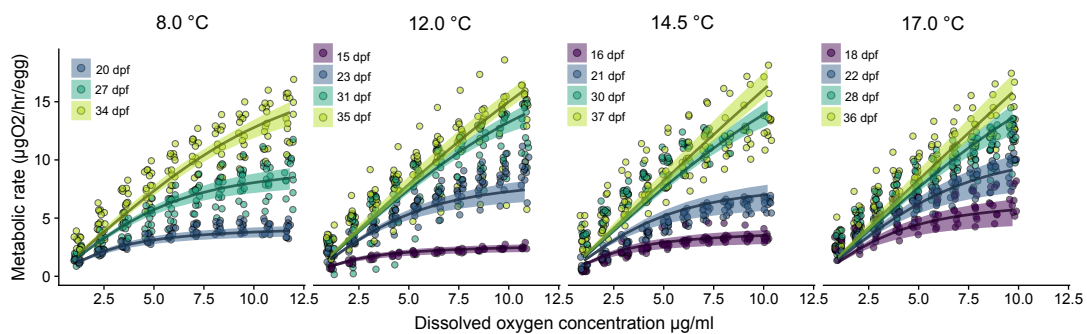

2

3 **Figure S1:** Observed metabolic rates of individual eggs (circles) as a function of O<sub>2</sub> in the  
4 respirometry chamber at intervals of 10% saturation. The developmental stages of experimental  
5 embryos (days post fertilization) are denoted by color. Lines represent predictions of the  
6 biophysical model (95% CI: bands). The two panels show data from the highest and lowest  
7 experimental temperatures

8

9

10

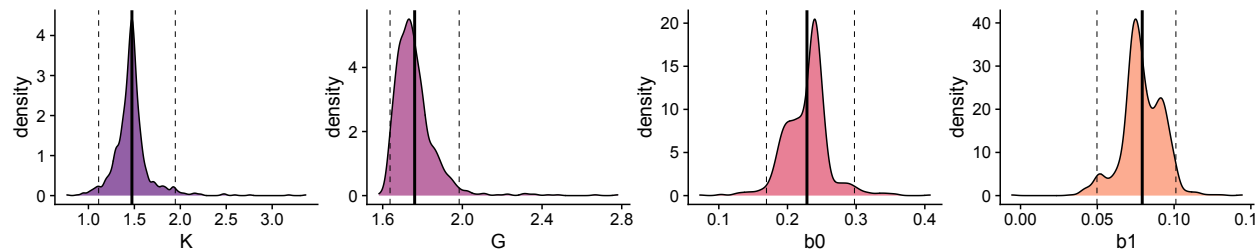

11

12 **Figure S2:** Probability distribution, mean (solid line), and 95% CI for model parameters (dashed  
13 lines). Probability distributions for parameters were generated by a non-parametric bootstrapping  
14 (N=1000).

15

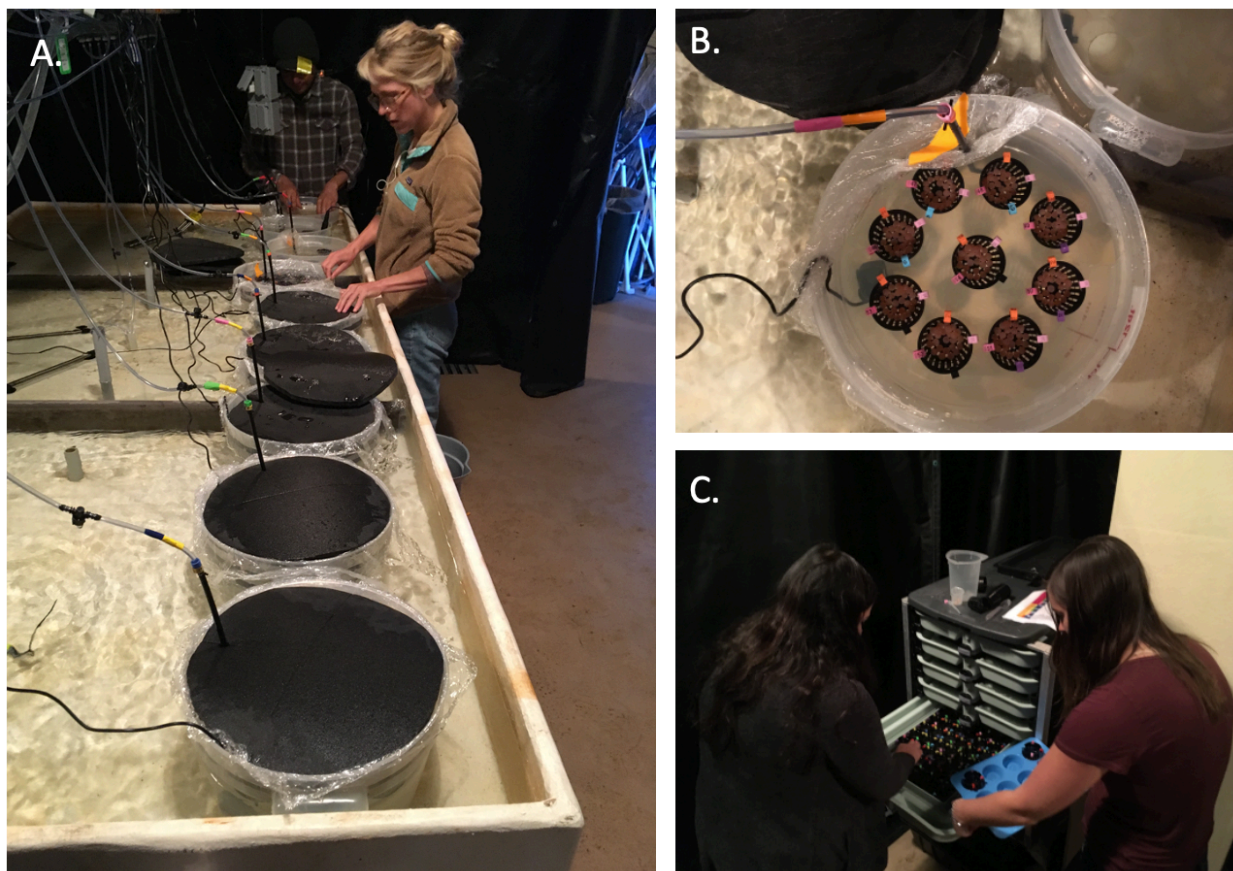

16

17 **Figure S3.** Experimental setup for oxygen supply/demand survival experiments. [A] The 9  
 18 experimental aquaria are divided among 3 sections of a water bath. Aquaria in each of the three  
 19 sections of the water bath were maintained at one of three temperatures (12, 14.5, 17 °C). Within  
 20 each partition, each aquarium received water from one of 3, 500-l reservoirs (not pictured)  
 21 maintained at three O<sub>2</sub> levels (saturation, 5.0 and 2.5 μg ml<sup>-1</sup>). A layer of polyethylene wrap and  
 22 a foam lid was placed on top of each aquarium to minimize gas exchange. [B] Top-down view of  
 23 an experimental aquaria, with the 9 replicate experimental baskets originally containing 25  
 24 embryos each. The water inflow spigot (at 12 o'clock), and the recirculating pump (at 9 o'clock)  
 25 can both be seen. [C] Before and after the experimental exposure period embryos were  
 26 maintained in a Heath (Flex-a-lite Consolidated) recirculating incubation tray.  
 27

28

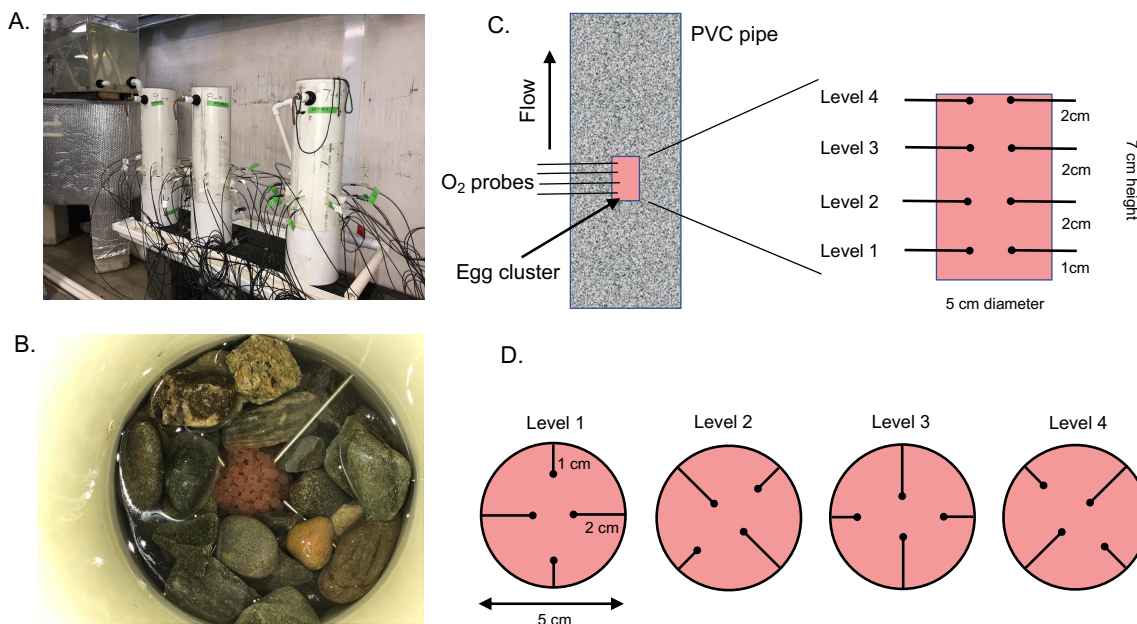

29

30 **Figure S4.** Measuring O<sub>2</sub> variability within egg clusters. **[A]** External view of gravel upwelling  
 31 chambers. **[B]** Downward facing view of the egg cluster within the PVC pipe before being  
 32 covered up with gravel. The top layer of the O<sub>2</sub> probes can be seen, although they are not yet  
 33 pushed into their final position. **[C]** Schematic of a vertical cross-section of the PVC pipe  
 34 showing the cluster position within the PVC pipe. On the right is a close-up view of the relative  
 35 vertical positions of each layer of O<sub>2</sub> probes. **[D]** Horizontal cross sections of each vertical layer  
 36 of O<sub>2</sub> probes shows the position of each of the 4 O<sub>2</sub> probes within each vertical layer. The  
 37 diameter of the circle represents the approximate diameter of the egg pocket (5 cm).  
 38
